# Supplementary material for: Influence of nanoparticle shape on charge transport and recombination in polymer/nanocrystal solar cells
Source: Royal Society of Chemistry journal article supplement (doi:10.1039/c4cp01111b), 2014-01-01
Supplement: c4cp01111b1.pdf [file c4cp01111b1.pdf]

# Influence of nanoparticle shape on charge transport and recombination in polymer/nanocrystal solar cells

## Supplementary Information

Zhe Li,<sup>a,\*†</sup> Weiyuan Wang,<sup>a</sup> Neil C Greenham,<sup>a</sup> Christopher R McNeill<sup>b\*</sup>

<sup>a</sup>Cavendish Laboratory, University of Cambridge, J J Thomson Ave, Cambridge, CB3 0HE, UK

<sup>b</sup>Department of Materials Engineering, Monash University, Clayton, Victoria 3800, Australia

Email: christopher.mcneill@monash.edu

\*Corresponding authors

<sup>†</sup>Current address: Department of Chemistry, Imperial College London, London SW7 2AZ, UK

Email: zhe.li@imperial.ac.uk

CdSe nanocrystals characterisation.

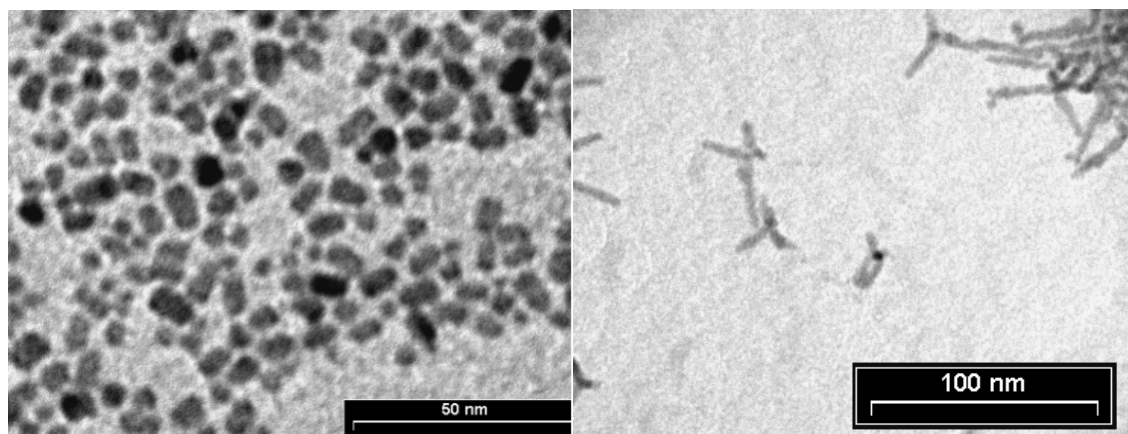

**Figure S1** TEM images of the CdSe nano-dots (left) and CdSe-nano-tetrapods.

Voltage-dependent transient photocurrent measurements.

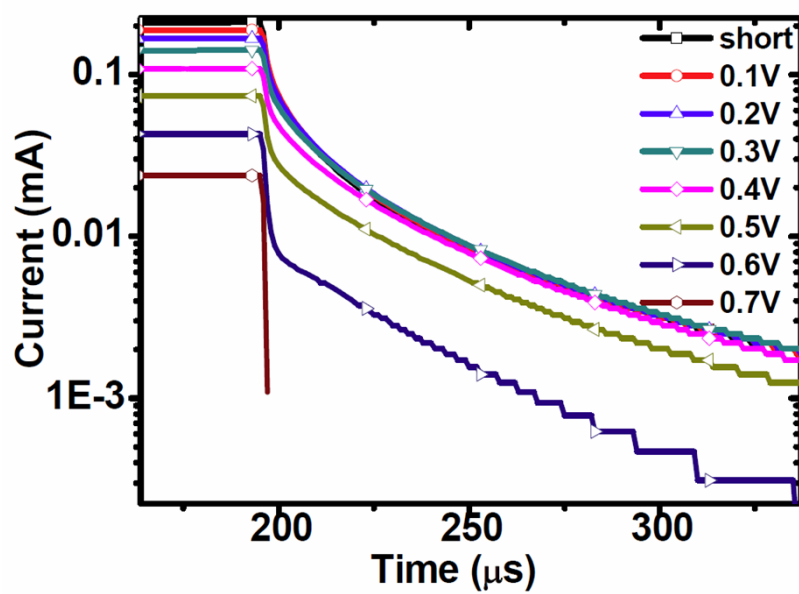

**Figure S2** Un-normalised decay kinetics of the voltage-dependent photocurrent transients for the P3HT/CdSe tetrapod device.
